# Supplementary material for: Molecular and physical characteristics of aerosol at a remote marine free troposphere site: Implications for atmospheric aging
Source: Copernicus journal article supplement (doi:10.5194/acp-2018-196), 2018-02-23
Supplement: Supplementary file 1 [file acp-2018-196-supplement.pdf]

1 **Supplemental Information**

2  
3 **Molecular and physical characteristics of aerosol at a remote**  
4 **marine free troposphere site: Implications for atmospheric**  
5 **aging**

6  
7 Simeon K. Schum<sup>1</sup>, Bo Zhang<sup>2,a</sup>, Katja Dzepina<sup>1,b</sup>, Paulo Fialho<sup>3</sup>, Claudio Mazzoleni<sup>2,4</sup> and Lynn  
8 R. Mazzoleni<sup>1,2</sup>

9  
10 <sup>1</sup>Department of Chemistry, Michigan Technological University, Houghton, MI, USA

11 <sup>2</sup>Atmospheric Science Program, Michigan Technological University, Houghton, MI, USA

12 <sup>3</sup>Institute for Volcanology and Risk Assessment – IVAR, University of the Azores, Angra do Heroísmo, Portugal

13 <sup>4</sup>Department of Physics, Michigan Technological University, Houghton, MI, USA

14 <sup>a</sup>now at the National Institute of Aerospace, Hampton, VA, USA

15 <sup>b</sup>now at the Department of Biotechnology, University of Rijeka, Croatia

16  
17 *Correspondence to:* Lynn R. Mazzoleni (lrmazzol@mtu.edu)

18  
19

20 **Table of Contents**

| Description                                                                            | Page |
|----------------------------------------------------------------------------------------|------|
| Pico Mountain Observatory                                                              | 3    |
| Supplemental Methods                                                                   | 3    |
| Table S1, ESI instrumentation parameters                                               | 4    |
| Table S2, Number of common species                                                     | 4    |
| Table S3, Molecular formula composition average values                                 | 5    |
| Table S4, Relative abundance weighted average values                                   | 5    |
| Figure S1, FLEXPART carbon monoxide source apportionment                               | 6    |
| Figure S2, Wildfire emissions from GFAS dataset                                        | 7    |
| Figure S3, Violin plots of O/C values                                                  | 8    |
| Figure S4, Violin plots of OS <sub>C</sub> values                                      | 8    |
| Figure S5, Common and unique formulas histograms                                       | 9    |
| Figure S6, Comparison of PMO-1 and PMO-2 unique CHOS                                   | 10   |
| Figure S7, H/C and DBE histograms                                                      | 11   |
| Figure S8, Aethalometer observations                                                   | 12   |
| Figure S9, OS <sub>C</sub> vs. volatility from Donahue et al. (2011)                   | 13   |
| Figure S10, OS <sub>C</sub> vs. volatility from Li et al. (2016)                       | 13   |
| Figure S11, Correlation of Donahue method vs. Li method                                | 14   |
| Figure S12, Estimated phase state for CHO species                                      | 15   |
| Figure S13, Cloud water composition comparison                                         | 16   |
| Figure S14, OM and ion concentrations                                                  | 16   |
| Figure S15, van Krevelen plots for all species separated by elemental group and sample | 17   |
| Figure S16, Reconstructed mass spectra of PMO-2                                        | 18   |
| Eq. S1, Average oxidation state of carbon (OS <sub>C</sub> )                           | 19   |
| Eq. S2, Aromaticity index (AI)                                                         | 19   |
| Eq. S3, Modified aromaticity index (AI <sub>mod</sub> )                                | 19   |
| Eq. S4, Double bond equivalents (DBE)                                                  | 19   |
| Eq. S5, Glass transition temperature estimation                                        | 20   |
| Eq. S6, Gordon-Taylor equation                                                         | 20   |
| Eq. S7, Phase state estimate                                                           | 20   |
| References                                                                             | 20   |

21  
22  
23  
24  
25  
26  
27  
28

## 29 **Pico Mountain Observatory**

30 Pico Mountain Observatory (PMO) is located in the summit caldera of Pico Mountain on Pico Island, in the Azores,  
31 Portugal (38.47 °N, 28.40 °W). The sampling site is located at an altitude of 2225 m asl. Pico mountain is the highest  
32 mountain in Portugal and in the central North Atlantic region (Honrath et al., 2008). The sampling site is often in the  
33 free troposphere as the marine boundary layer height in the area is normally between 500 and 2000 m (Kleissl et al.,  
34 2007; Rémillard et al., 2012; Zhang et al., 2017). At the site there is a variety of instrumentation such as a seven  
35 wavelength aethalometer, nephelometer, optical particle counter, and ozone detector. In various studies this site has  
36 been denoted as PMO, PICO-NARE, and OMP. Its identifying code is PIC in the NOAA database.

37

## 38 **Supplemental Methods**

### 39 **Organic and Elemental Carbon Analysis**

40 For each sample collected, a minimum of three circular 16 mm diameter filter punches were analyzed. If all three  
41 punches had consistent organic carbon concentrations (relative standard deviation, RSD < 15 %), the average value  
42 was used to determine the total loading of OC on the filter and in the air during the sampling period. If the replicates  
43 were inconsistent, more replicates were analyzed until at least three were consistent. Elemental carbon measurements  
44 were also obtained with this instrument, but in nearly all cases they were below the detection limit, so those values  
45 are not reported.

46

### 47 **Ion Chromatography**

48 PMO samples were also analyzed for major anions and cations using ion chromatography (IC). Anion analysis was  
49 performed using a Dionex ICS-2100 instrument (Thermo Scientific) with an AS-17-C analytical and guard column  
50 set (Thermo Scientific) using a KOH generator for gradient elution. The gradient elution had the following steps: -5  
51 – 0 min., Equilibrate, 1 mM KOH, 0 – 15 min., Isocratic, 1 mM KOH, 15 – 20 min., Ramp, 1 – 10 mM KOH, 20 – 30  
52 min., Isocratic, 10 mM KOH, 30 – 40 min., Ramp, 10 – 20 mM KOH, 40 – 45 min., Isocratic, 20 mM KOH, 45 – 55  
53 min., and Ramp, 20 – 40 mM KOH. Cation analysis was performed using a Dionex ICS-1100 instrument with CS-  
54 12A analytical and guard column set (Thermo Scientific) and an isocratic 20 mM methanesulfonic acid eluent. The  
55 instruments were operated in parallel using split flow from autosampler. The samples were prepared using the  
56 California Air Resource Board method (California Environmental Protection Agency, 2011). Briefly, five square  
57 punches of 3.98 cm<sup>2</sup> each were taken from each filter and placed into a pre-cleaned 15 mL disposable centrifuge tube,  
58 to which 100 µL of isopropanol was added to help dissolve the less soluble organic species. Finally, 12 mL of 18.2  
59 MOhm deionized water from an Easy Pure water system (Barnstead, ThermoFisher Waltham, MA, USA) were added  
60 to each centrifuge tube. These samples were then sonicated for 60 minutes with blue ice added to the sonication bath  
61 to keep the temperature below 25 °C. Once sonicated, the samples were stored in the refrigerator overnight and  
62 transferred with 0.45 µm nylon syringe filters (Fisher Brand, Waltham, MA, USA) and sterile 3 mL syringes (BD,  
63 Franklin Lakes, NJ, USA) to 5 mL IC vials (Thermo Scientific, Waltham, MA, USA) the following day. The samples  
64 were then run on the IC system. After the ion concentrations were determined, they were background subtracted using  
65 field blanks from PMO.

66  
67 **Retroplume Analysis**  
68 Retroplume analysis was conducted using the Lagrangian particle dispersion model FLEXPART. (Seibert and Frank,  
69 2004; Stohl et al., 2005; Owen and Honrath, 2009) The backward mode of FLEXPART was used to simulate backward  
70 transport trajectories from the PMO. The Global Forecast System (GFS) fields were used to drive FLEXPART. In the  
71 backward mode, hundreds of thousands of passive particles (tracer) were released from the receptor. The advection  
72 and dispersion of the particles were simulated backwards in time. The product of a backward simulation is an upwind  
73 spatial distribution of the particle residence times (average time an air parcel stays within a model grid cell), referred  
74 to as a “retroplume” (Seibert and Frank, 2004). In this study we report three specific events, one that took place on  
75 June 27 (19:00) -28 (19:00), 2013 (PMO-1), one on July 05 (15:00) - 06 (15:00), 2014 (PMO-2), and one on June 20  
76 (15:00) - 21 (15:00), 2015 (PMO-3).

77  
78  
79 **Supplemental Tables**

80  
81 **Table S1.** The ionization parameters for negative mode ESI FT-ICR MS for each of the samples are present in this  
82 table.

| Sample      | Spray Voltage (V) | Sheath Gas Flow ( $\mu\text{L}/\text{min}$ ) | Source Temp ( $^{\circ}\text{C}$ ) |
|-------------|-------------------|----------------------------------------------|------------------------------------|
| PMO-1 Rep 1 | 3.40              | 5.0                                          | 275                                |
| PMO-1 Rep 2 | 3.15              | 5.0                                          | 275                                |
| PMO-2 Rep 1 | 3.25              | 4.5                                          | 275                                |
| PMO-2 Rep 2 | 3.25              | 4.5                                          | 275                                |
| PMO-3 Rep 1 | 3.15              | 4.5                                          | 275                                |
| PMO-3 Rep 2 | 3.15              | 4.5                                          | 275                                |

83  
84  
85  
86  
87 **Table S2.** Number of common species between this study and previous studies at PMO (Dzepina et al., 2015) and  
88 SPL (Mazzoleni et al., 2012). The percentages indicate the percent of common species for the sample indicated by  
89 the row names.

|       | PMO-1        | PMO-2        | PMO-3        | Dzepina 2015 | Mazzoleni 2012 |
|-------|--------------|--------------|--------------|--------------|----------------|
| PMO-1 | X            | 1697 (53.6%) | 1633 (51.5%) | 2730 (86.2%) | 1951 (61.6%)   |
| PMO-2 | 1697 (80.0%) | X            | 1253 (59.1%) | 1585 (74.7%) | 1661 (78.3%)   |
| PMO-3 | 1633 (89.7%) | 1253 (68.8%) | X            | 1704 (90.6%) | 1429 (76.0%)   |

92 **Table S3.** Molecular formula composition average values with standard error and number for each elemental group.  
 93

| Sample | Group | O/C           | H/C          | DBE          | OSc          | Number |
|--------|-------|---------------|--------------|--------------|--------------|--------|
| PMO-1  | CHO   | 0.46 ± 0.0074 | 1.28 ± 0.014 | 8.16 ± 0.130 | -0.36± 0.023 | 1848   |
| PMO-2  | CHO   | 0.51 ± 0.0097 | 1.37 ± 0.015 | 6.59 ± 0.152 | -0.36± 0.029 | 1281   |
| PMO-3  | CHO   | 0.45 ± 0.0075 | 1.36 ± 0.016 | 7.34 ± 0.178 | -0.46± 0.026 | 1183   |
| PMO-1  | CHNO  | 0.48 ± 0.0070 | 1.21 ± 0.015 | 9.40 ± 0.180 | -0.25± 0.020 | 1120   |
| PMO-2  | CHNO  | 0.58 ± 0.012  | 1.26 ± 0.015 | 8.03 ± 0.19  | -0.10± 0.027 | 561    |
| PMO-3  | CHNO  | 0.48 ± 0.0077 | 1.24 ± 0.016 | 9.08 ± 0.185 | -0.28± 0.069 | 608    |
| PMO-1  | CHOS  | 0.50± 0.019   | 1.77± 0.026  | 3.04± 0.218  | -0.77± 0.056 | 200    |
| PMO-2  | CHOS  | 0.67± 0.0302  | 1.61± 0.029  | 3.89± 0.250  | -0.27± 0.058 | 274    |
| PMO-3  | CHOS  | 0.41 ± 0.036  | 1.90 ± 0.078 | 1.72 ± 0.432 | -1.1 ± 0.069 | 29     |

94  
 95  
 96  
 97  
 98  
 99

100 **Table S4.** Relative abundance weighted average values for the composition of molecular formulas in each molecular  
 101 group.

| Sample | Group | O/C <sub>w</sub> | H/C <sub>w</sub> | DBE <sub>w</sub> | OSc <sub>w</sub> |
|--------|-------|------------------|------------------|------------------|------------------|
| PMO-1  | CHO   | 0.47 ± 0.14      | 1.31 ± 0.29      | 7.43 ± 3.68      | -0.37 ± 0.44     |
| PMO-2  | CHO   | 0.55 ± 0.17      | 1.35 ± 0.25      | 6.43 ± 3.66      | -0.26 ± 0.45     |
| PMO-3  | CHO   | 0.44 ± 0.14      | 1.37 ± 0.31      | 6.93 ± 3.82      | -0.48 ± 0.48     |
| PMO-1  | CHNO  | 0.49 ± 0.15      | 1.2 ± 0.26       | 9.44 ± 3.09      | -0.22 ± 0.32     |
| PMO-2  | CHNO  | 0.59 ± 0.14      | 1.25 ± 0.19      | 8.20 ± 2.19      | -0.07 ± 0.31     |
| PMO-3  | CHNO  | 0.49 ± 0.14      | 1.23 ± 0.21      | 9.25 ± 2.41      | -0.25 ± 0.27     |
| PMO-1  | CHOS  | 0.48 ± 0.14      | 1.78 ± 0.35      | 2.87 ± 3.28      | -0.82 ± 0.53     |
| PMO-2  | CHOS  | 0.74 ± 0.34      | 1.57 ± 0.23      | 4.05 ± 2.45      | -0.08 ± 0.70     |
| PMO-3  | CHOS  | 0.40 ± 0.14      | 1.90 ± 0.47      | 1.60 ± 4.29      | -1.1 ± 0.68      |

103  
 104  
 105  
 106  
 107  
 108  
 109  
 110  
 111

112 Supplemental Figures

113

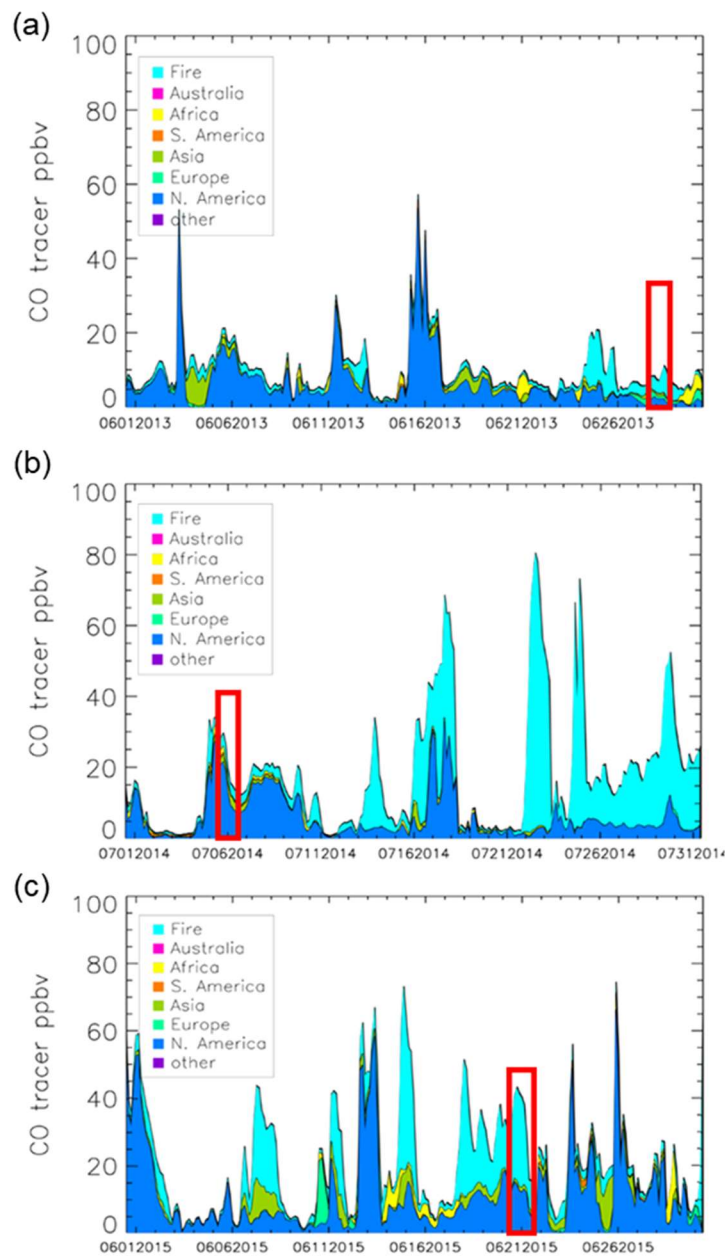

114

115 **Figure S1.** FLEXPART carbon monoxide source apportionment plot. PMO-1 (a), PMO-2 (b), PMO-3 (c). The red

116 rectangle highlights the sampling period for each sample.

117

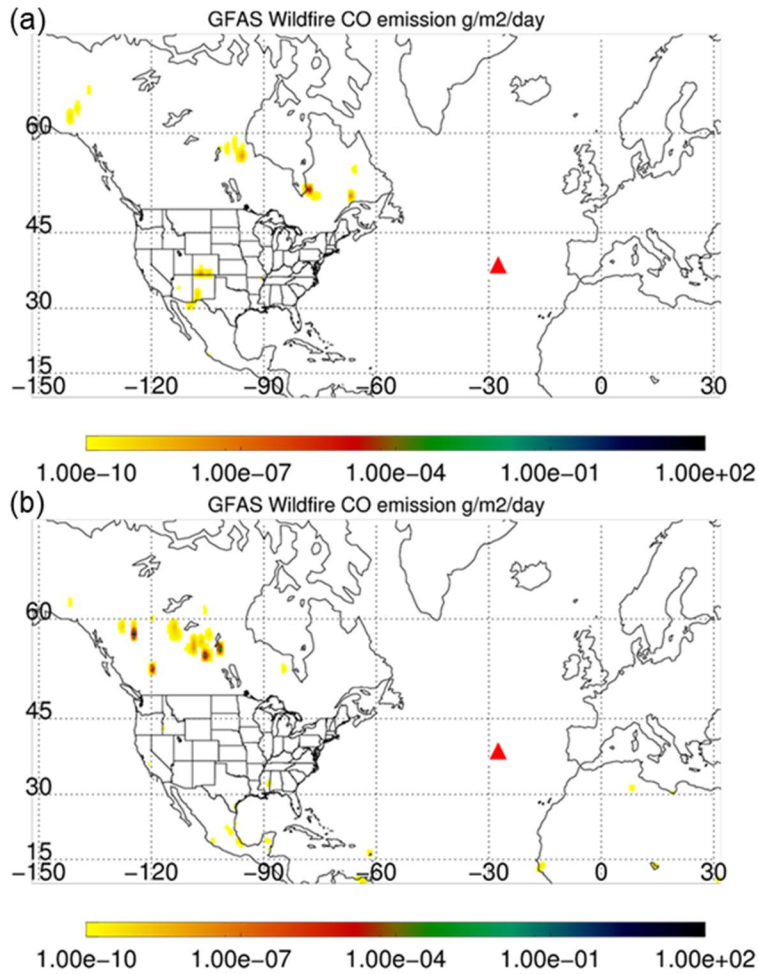

118

119 **Figure S2.** Wildfire emissions from GFAS dataset for the week corresponding to the PMO-1 event (a) and the PMO-  
 120 3 event (b). Note the strong fire in western Quebec, which spatially corresponds to the most likely path in the PMO-1  
 121 retroplume. Multiple fires in central and western Canada may have impacted PMO-3, although they are not spatially  
 122 proximate to the most likely path in the PMO-3 retroplume.

123

124

125

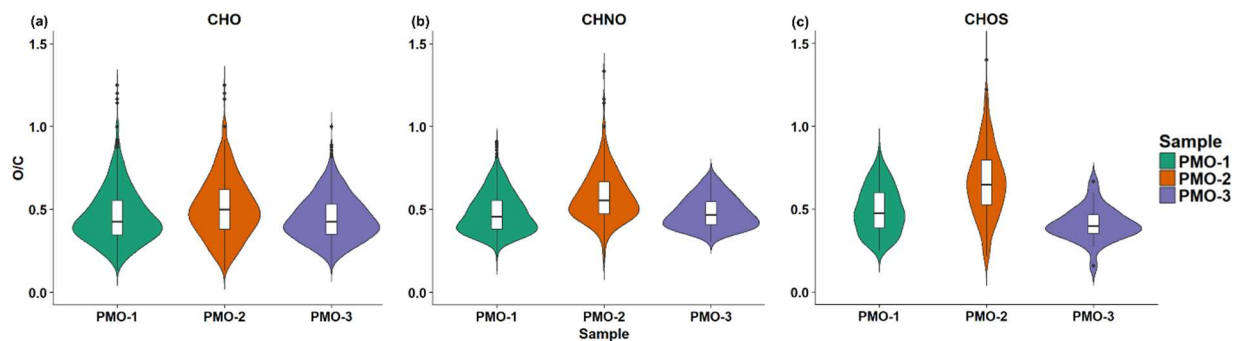

126

127 **Figure S3.** Violin plots showing the number distribution of species according to their O/C values separated by  
128 molecular groups.

129

130

131

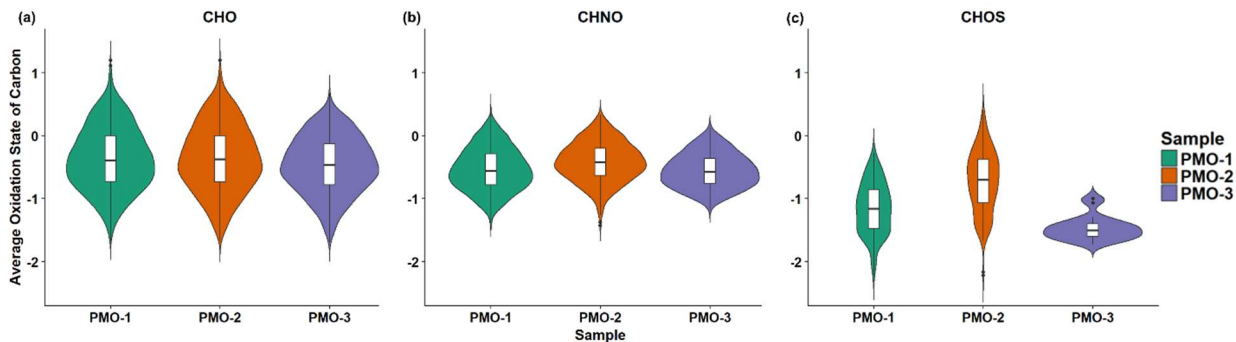

132

133 **Figure S4.** Violin plots showing the number distribution of species according to their OS<sub>C</sub> values separated by  
134 molecular groups.

135

136

137



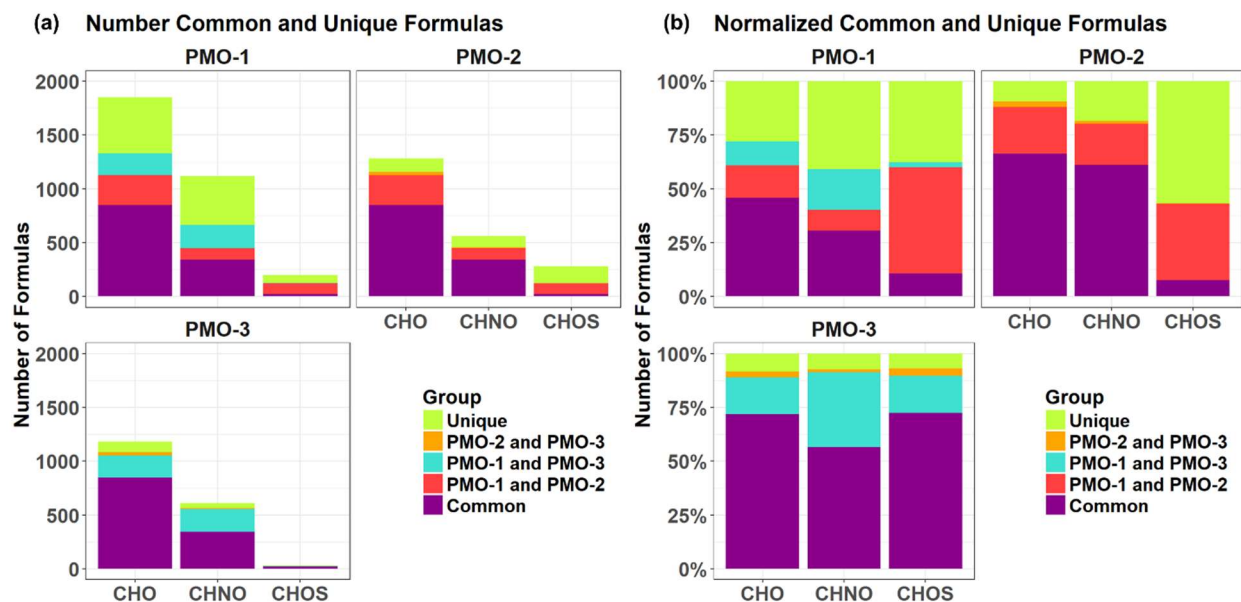

138

139 **Figure S5.** Molecular formulas common to all three samples and those unique to each sample presented as the total  
 140 number of formulas (a) and as a percent of total number of formulas (b).

141

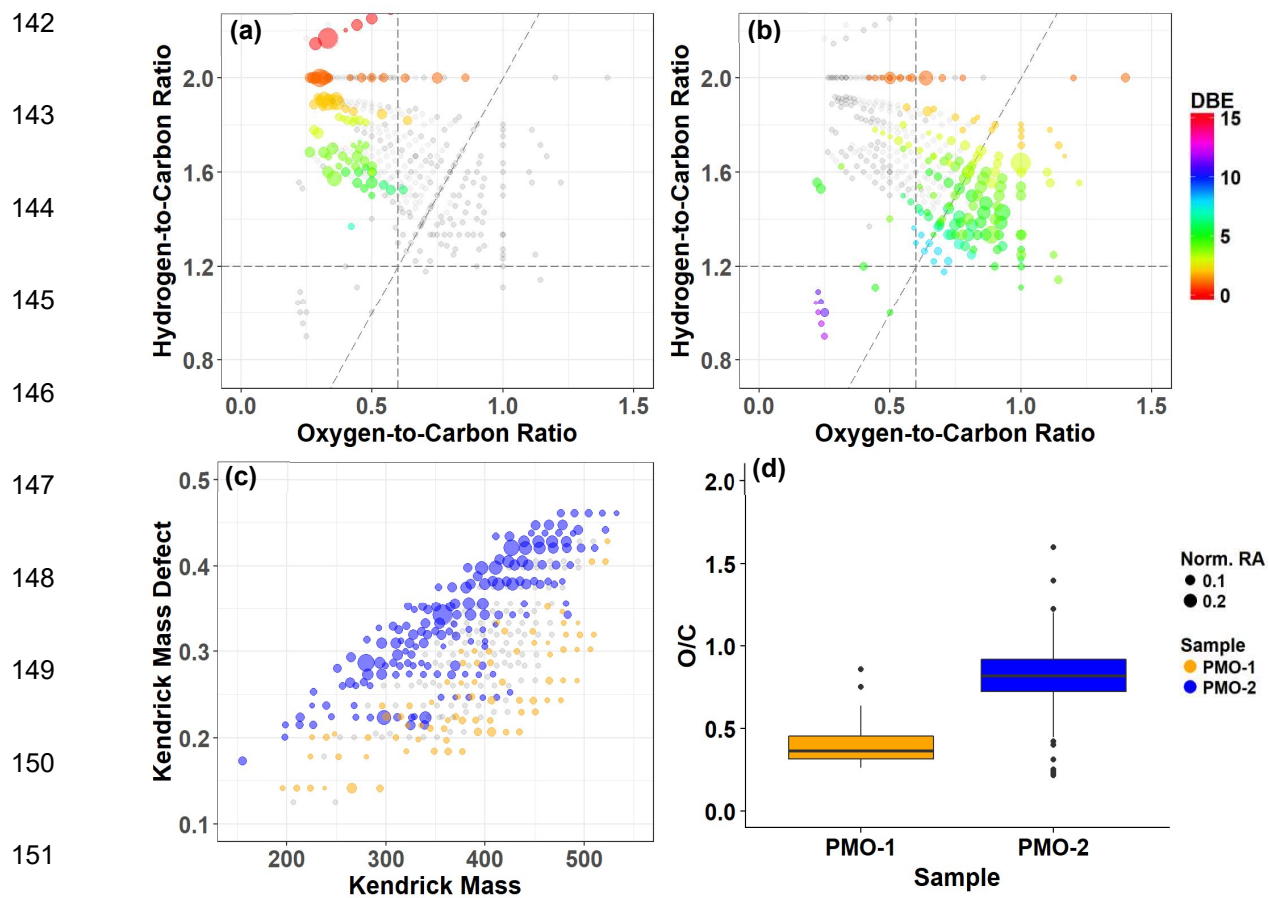

152 **Figure S6.** A comparison of PMO-1 and PMO-2 CHOS molecular formulas using van Krevelen  
 153 (a, b), Kendrick plots (c), and O/C box plots (d). Common CHOS molecular formulas (grey) and  
 154 unique CHOS molecular formulas (colored) are indicated in a-c.

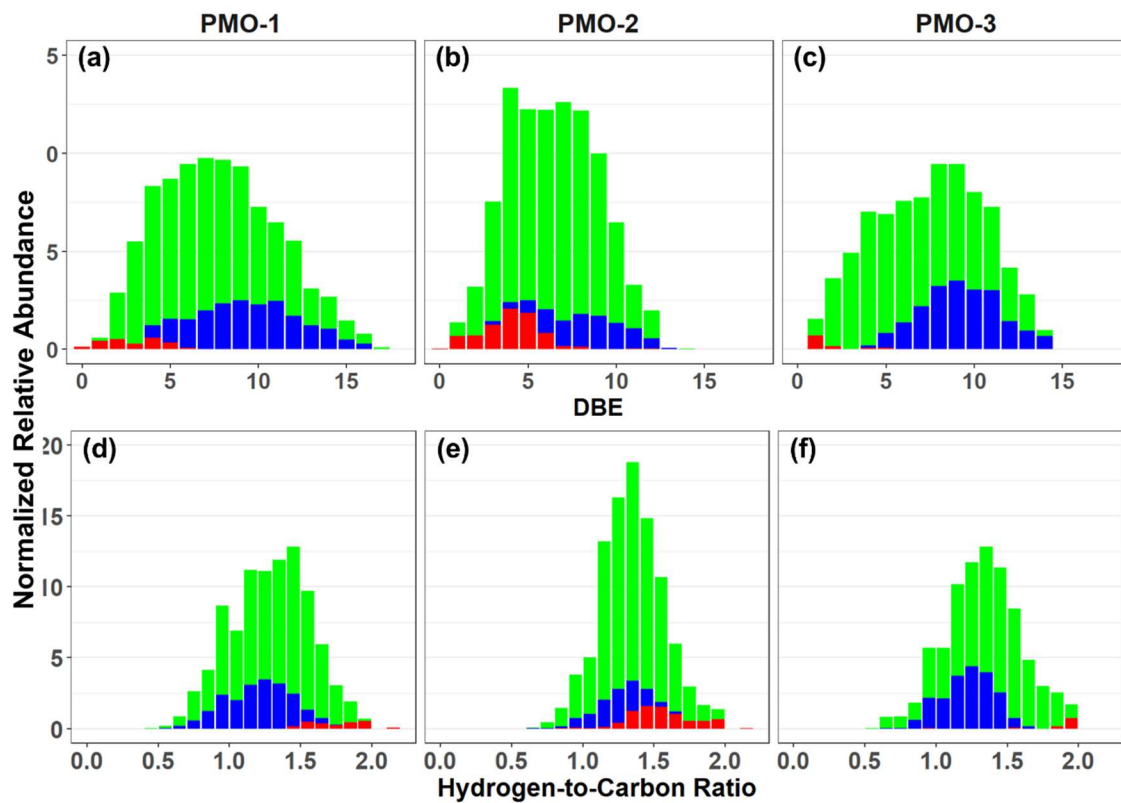

155

156 Figure S7. Histograms of the molecular formula DBE (a-c) and H/C (d-f).

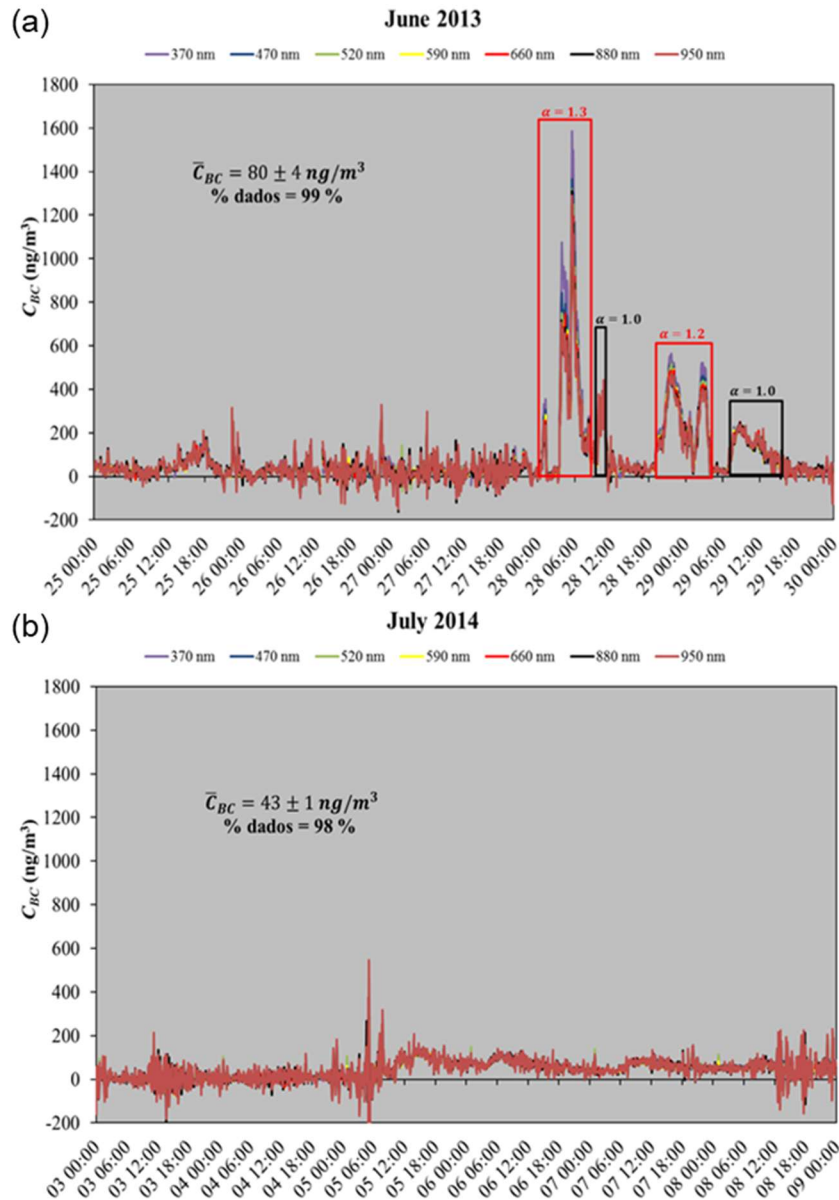

157

158 **Figure S8.** Aethalometer results for the PMO-1 (a) and PMO-2 (b) sampling periods. A few days before and after  
 159 each sampling period are included for reference. Note the tallest wavelength dependent peak present from  
 160 approximately 28 June at 00:00 to 28 June at 09:00 local time (first red box), which corresponds to the sampling period  
 161 of PMO-1. When the absorption angstrom exponent ( $\alpha$ ) equals 1, it suggests black carbon, when it is equal to 1.3 or  
 162 1.2 it suggests presence of brown carbon as well. Due to instrument maintenance/repair no data was available for the  
 163 time period associated with PMO-3. The sampling period for PMO-2 did not demonstrate similar peaks or wavelength  
 164 dependence.

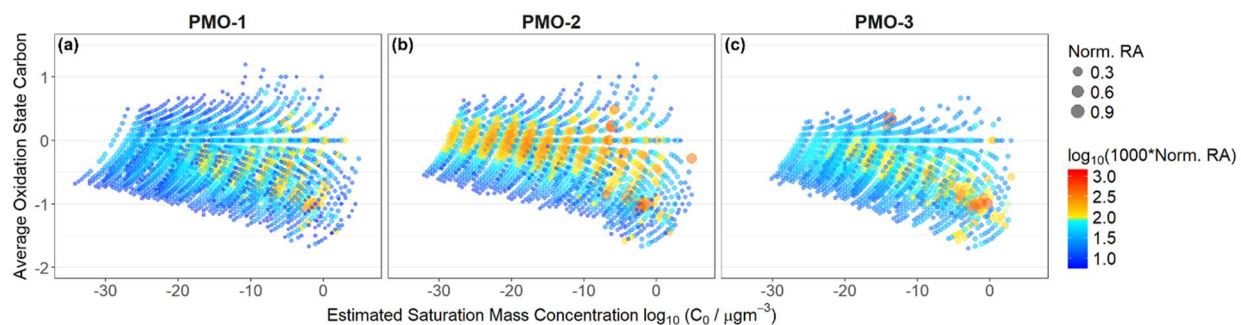

165  
 166 **Figure S9.**  $OS_C$  vs. volatility plots for the three samples. Volatility estimated were made using the Donahue et al.  
 167 (2011) method. Only volatility for CHO species can be estimated with this method. Color is the logarithm of the  
 168 normalized relative abundance multiplied by 1000. Of interest is the increased abundance of low volatility, higher  
 169 oxidation species in PMO-2 relative to PMO-1 and PMO-3, indicating the importance of these species to this sample  
 170 and highlighting a difference between these samples.

171  
 172  
 173

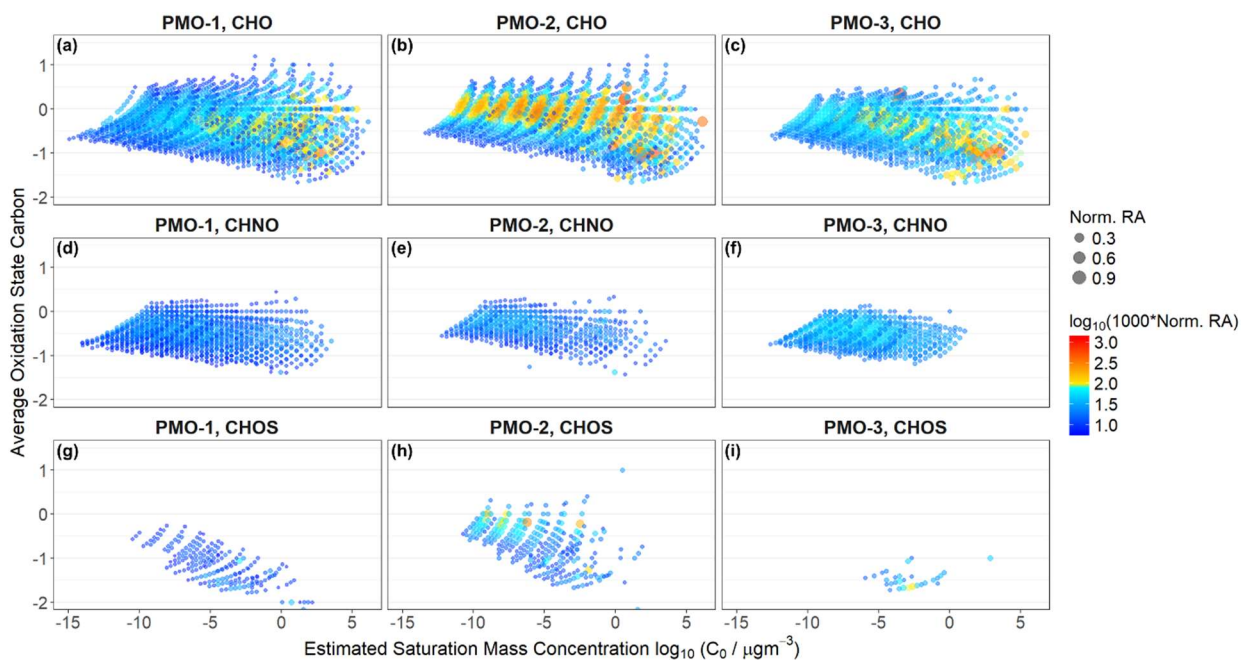

174  
 175 **Figure S10.** Group separated  $OS_C$  vs. volatility plots for the three samples. Volatility estimated using the Li et al.  
 176 (2016) method. Color is the logarithm of the normalized RA multiplied by 1000. The same increase in abundance  
 177 for low volatility, higher oxidation species is observed in this figure as in Fig. S7.

178

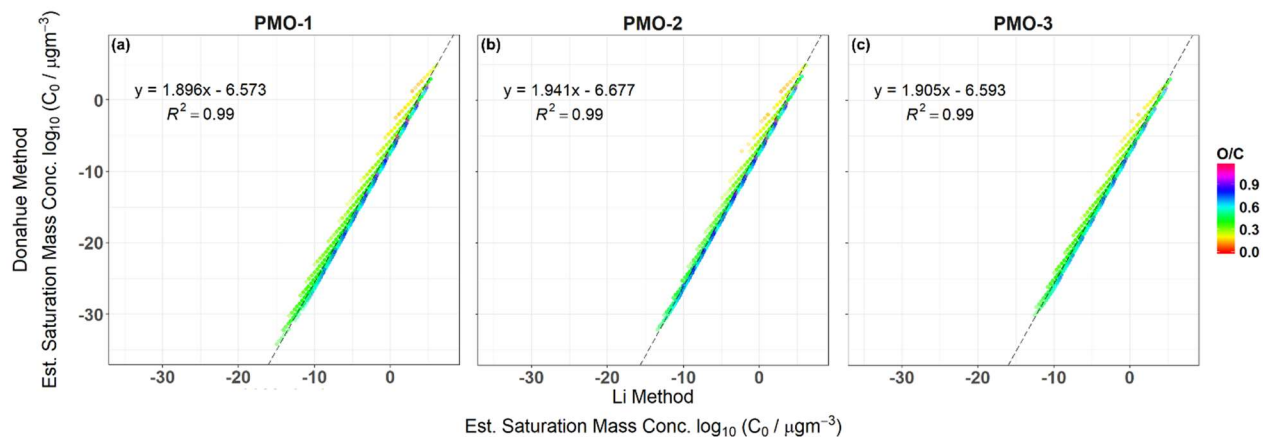

179

180 **Figure S11.** Correlation plot of volatility calculated by the Li et al. (2016) method and the Donahue et al. (2011)  
 181 method. The comparison is linear although the slope of the line is nearly two, indicating that the Donahue method  
 182 predicts values that are roughly two times what the Li method predicts, at least for the low and extremely low  
 183 volatility species presented here.

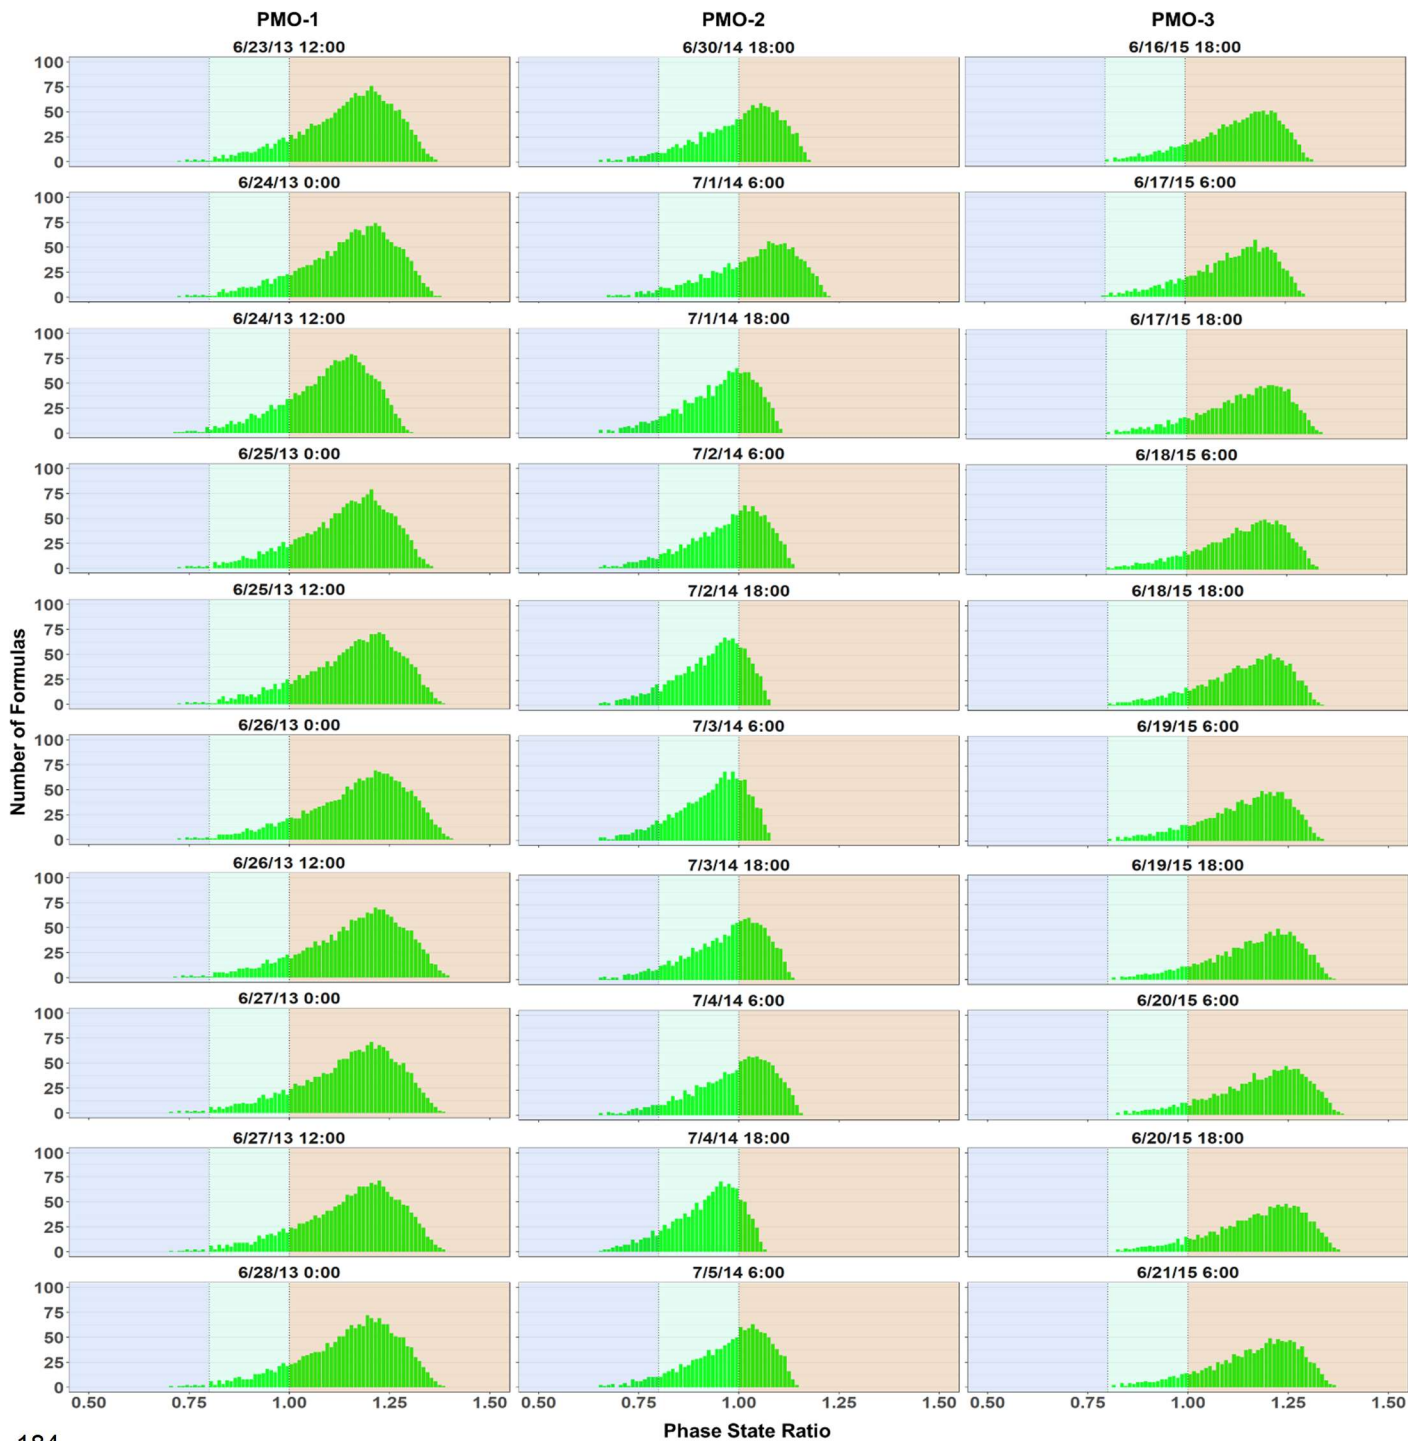

184  
 185 **Figure S12.** The distribution of phase state ratios for all of the CHO molecular formulas calculated using the 12 hour  
 186 average temperature and RH values for the last 5 days. The phase state ratios corresponding to the solid, semi-solid,  
 187 or liquid state are shaded with tan, green, and blue, respectively. Each column corresponds to a single sample.  
 188

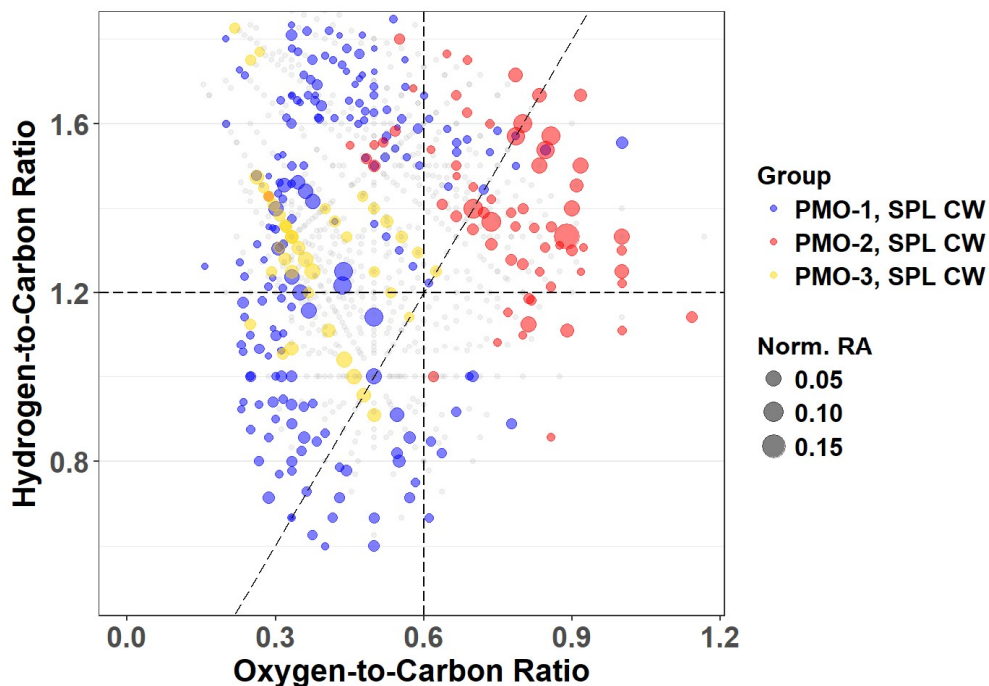

189  
 190 **Figure S13.** Van Krevelen plot showing the molecular formulas that are common to only one PMO samples and the  
 191 cloud water samples from SPL. PMO-2 (red) molecular formulas located nearly exclusively in highly oxidized region  
 192 of plot, may perhaps indicate cloud processing. Common molecular formulas from either PMO-1 (blue) and PMO-3  
 193 (gold) may be related to the biomass combustion that influenced the supercooled cloud water collected in the winter  
 194 at SPL.

195  
 196

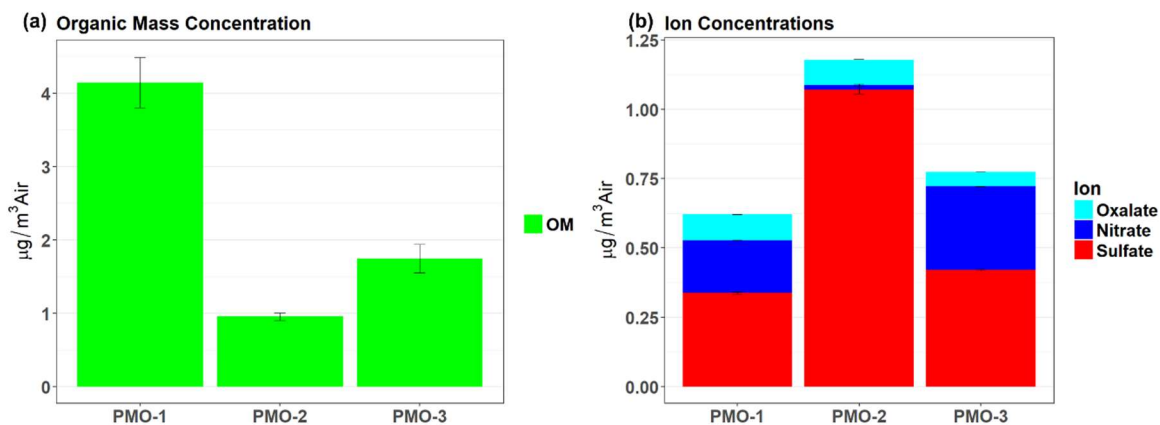

197  
 198  
 199 **Figure S14.** Organic mass concentrations (a) and sulfate, nitrate and oxalate concentrations (b).  
 200



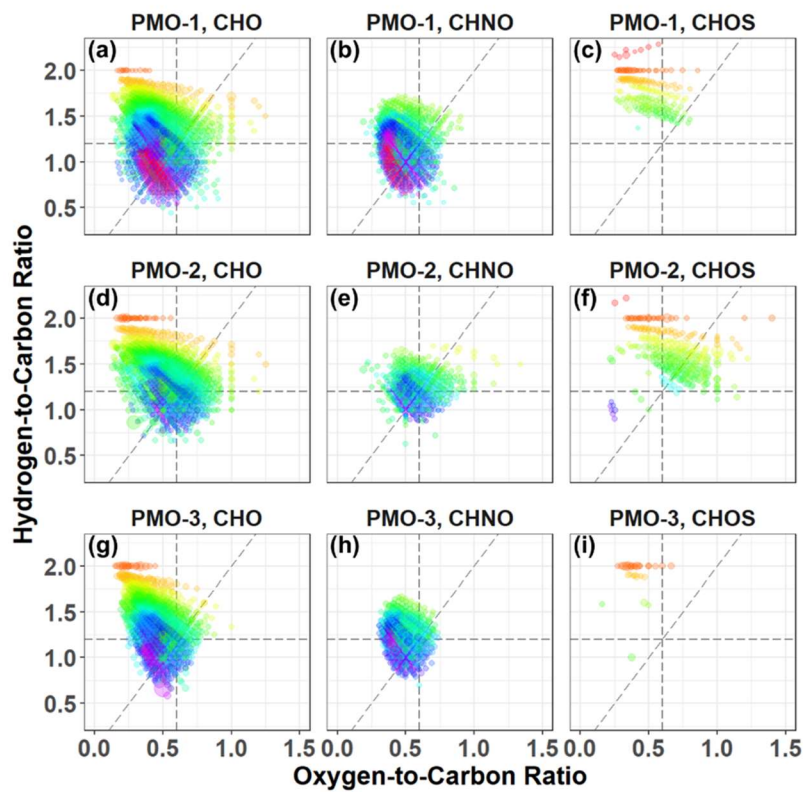

201  
 202 **Figure S15.** Group separated van Krevelen diagrams for the three samples. PMO-1 is in panels a-c, PMO-2 in panels  
 203 d-f, and PMO-3 in panels g-i.

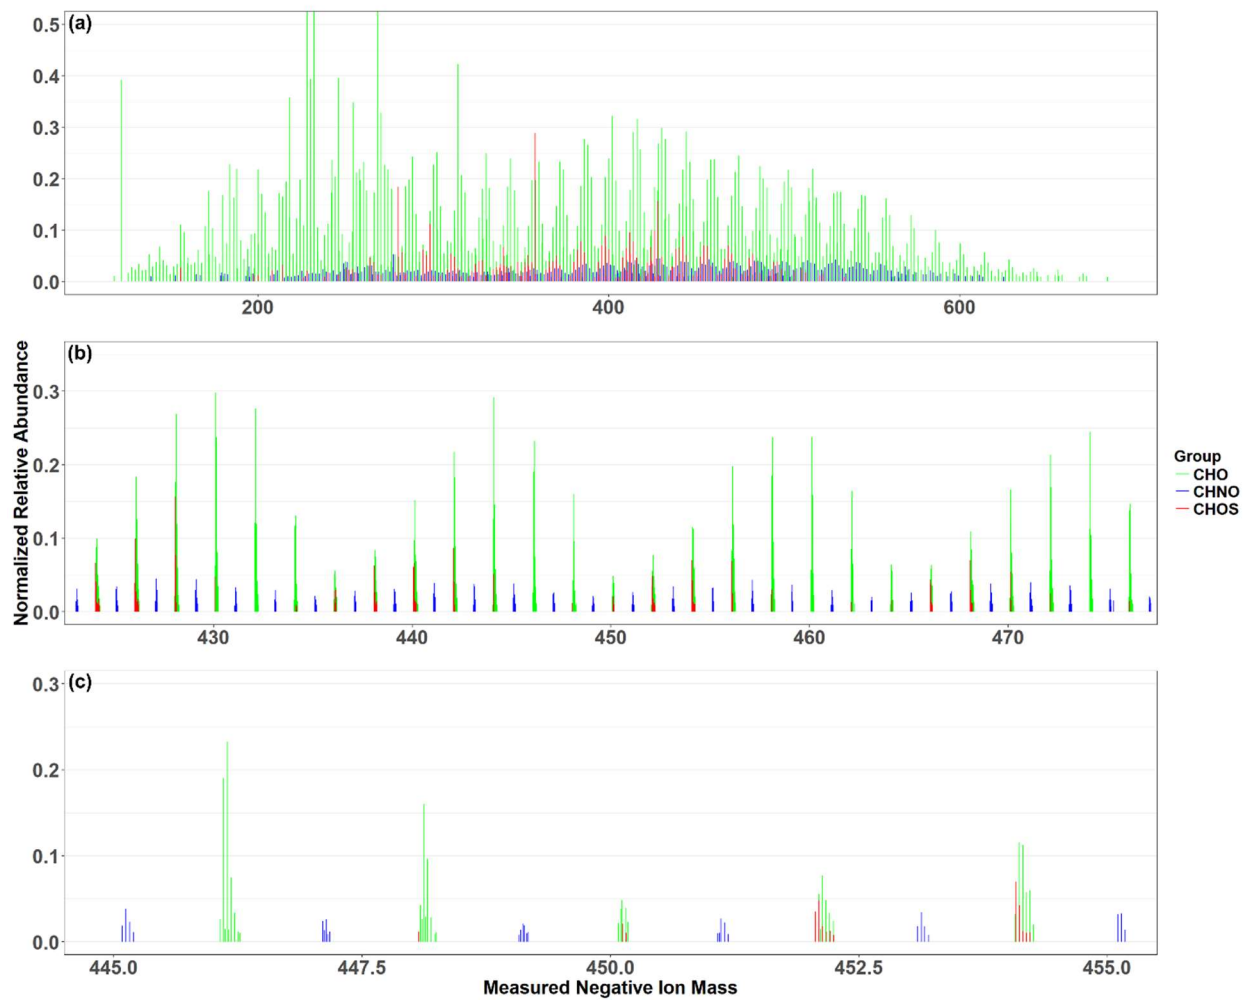

204

205

206 **Figure S16.** Progressively zoomed reconstructed mass spectrum of PMO-2 to demonstrate complexity of the  
 207 sample.

208

209

210

211

212

213

214

215

216

217

218

219

220

221

222  
 223  
 224  
 225  
 226  
 227  
 228  
 229  
 230  
 231  
 232  
 233  
 234  
 235  
 236  
 237  
 238  
 239  
 240  
 241  
 242  
 243  
 244  
 245  
 246  
 247  
 248  
 249  
 250  
 251  
 252  
 253  
 254  
 255  
 256  
 257  
 258  
 259  
 260  
 261  
 262  
 263  
 264  
 265  
 266  
 267  
 268

### Supplemental Equations

**Equation S1.** This is the general equation for the average oxidation state of carbon ( $OS_C$ ). Sulfur and nitrogen play a role in the oxidation of the species, but it varies based on what oxidation state (Kroll et al. 2011). In this case sulfur and nitrogen are assumed to be fully oxidized.

$$OS_C \approx 2 * \frac{\#O}{\#C} - \frac{\#H}{\#C} - 5 * \frac{\#N}{\#C} - 6 * \frac{\#S}{\#C}$$

**Equation S2.** This is the standard equation for aromaticity index (AI) from Koch and Dittmar (2006; 2016). This is the most conservative method for calculating aromaticity as it assumes that all bonded oxygen is in carbonyl groups. The threshold for olefinic species is  $0 < AI \leq 0.5$ , for aromatic it is  $0.5 < AI \leq 0.67$ , and for condensed aromatic it is  $0.67 < AI \approx 1$ . All other species are defined as  $AI = 0$  making them aliphatic.

$$AI = \frac{1 + C - O - S - 0.5 * H - 0.5 * N}{C - O - S - N}$$

**Equation S3.** Less conservative method for calculating aromaticity index from Koch and Dittmar (2006; 2016) as it assumes that half the bonded oxygen is in carbonyl groups. The threshold for olefinic species is  $0 < AI_{mod} \leq 0.5$ , for aromatic it is  $0.5 < AI_{mod} \leq 0.67$ , and for condensed aromatic it is  $0.67 < AI_{mod} \approx 1$ . All other species are defined as  $AI_{mod} = 0$  making them aliphatic

$$AI_{mod} = \frac{1 + C - 0.5 * O - S - 0.5 * H - 0.5 * N}{C - 0.5 * O - S - N}$$

**Equation S4.** Generic calculation for DBE. C represents carbon, H represents hydrogen, X represents halogens, and N represents nitrogen. Oxygen and sulfur do not play a role in the DBE calculation.

$$DBE = \#C + 1 - \frac{\#H}{2} - \frac{\#X}{2} + \frac{\#N}{2}$$

**Equation S5.** Glass transition temperature estimation equation from DeRieux et al., 2017.  $n_C^0$  is the carbon reference number ( $12.13 \pm 2.66$ ),  $b_C$ ,  $b_H$ , and  $b_O$  are the contributions of each atom to  $T_g$ , and  $b_{CH}$  and  $b_{CO}$  represent the contribution of carbon-hydrogen and carbon-oxygen bonds respectively. Values for the terms can be found in DeRieux et al. 2017. The equation determines the dry glass transition temperature, while the Gordon-Taylor Equation (Eq. S6) is required to calculate the transition temperature in non-dry conditions.

$$T_g = (n_C^0 + \ln(n_C)) b_C + \ln(n_H) b_H + \ln(n_C) \ln(n_H) b_{CH} + \ln(n_O) b_O + \ln(n_C) \ln(n_O) b_{CO}$$

269 **Equation S6.** Gordon-Taylor Equation as presented by DeRieux et al. (2017) to calculate the glass transition  
 270 temperature in humid conditions.  $w_{org}$  is the mass fraction of organics,  $T_{g,w}$  is the glass transition temperature for  
 271 water (136 K),  $k_{GT}$  is the Gordon-Taylor constant (assumed to be 2.5, consistent with DeRieux et al. 2017 and  
 272 Shiraiwa et al. 2017), and  $T_{g,org}$  is the dry glass transition temperature calculated by Eq. S5. For greater detail see  
 273 DeRieux et al. 2017 and Shiraiwa et al. 2017.  
 274

$$T_g(w_{org}) = \frac{(1 - w_{org})T_{g,w} + \frac{1}{k_{GT}}w_{org}T_{g,org}}{(1 - w_{org}) + \frac{1}{k_{GT}}w_{org}}$$

275  
 276  
 277  
 278 **Equation S7.** Adapted Gordon-Taylor equation for use with inputs for relative humidity (RH), dry glass transition  
 279 temperature, and ambient temperature. This generates the phase state ratio (PSR), which predicts the phase the  
 280 molecular species is likely in,  $PSR \geq 1$  is solid,  $0.8 \leq PSR < 1$  is semi-solid, and  $PSR < 0.8$  is liquid. This  
 281 equation converts  $w_{org}$  to a relative humidity dependent term as described in DeRieux et al. (2017) and Shiraiwa et  
 282 al. (2017), and converts  $1/k_{GT}$  to 0.4, which is its value using the assumption of  $k_{GT}$  equals 2.5.  $T_{amb}$  is the ambient  
 283 temperature.  
 284

$$\text{Phase State Ratio} = \frac{\left( \left( 1 - \frac{1.4 - \frac{1.4 * RH}{100}}{1.4 - \frac{1.28 * RH}{100}} \right) * 136 + 0.4 * \left( \frac{1.4 - \frac{1.4 * RH}{100}}{1.4 - \frac{1.28 * RH}{100}} \right) * T_{g,org} \right)}{\left( \left( 1 - \frac{1.4 - \frac{1.4 * RH}{100}}{1.4 - \frac{1.28 * RH}{100}} \right) + 0.4 * \left( \frac{1.4 - \frac{1.4 * RH}{100}}{1.4 - \frac{1.28 * RH}{100}} \right) \right)} T_{amb}$$

285  
 286  
 287  
 288  
 289 **References**  
 290  
 291 Chang, O., Procedure for the analysis of particulate anions and cations in motor vehicle exhaust by ion  
 292 chromatography, California EPA Air Resources Board, 2011  
 293 DeRieux, W. W., Li, Y., Lin, P., Laskin, J., Laskin, A., Bertram, A. K., Nizkorodov, S. A. and Shiraiwa, M.:  
 294 Predicting the glass transition temperature and viscosity of secondary organic material using molecular  
 295 composition, Atmos. Chem. Phys. Disc., 1–41, doi:10.5194/acp-2017-1066, 2017.  
 296 Donahue, N., Epstein, S., Pandis, S. and Robinson, A.: A two-dimensional volatility basis set: 1. organic-aerosol  
 297 mixing thermodynamics, Atmos. Chem. Phys., 11(7), 3303–3318, doi:10.5194/acp-11-3303-2011, 2011.  
 298 Dzepina, K., Mazzoleni, C., Fialho, P., China, S., Zhang, B., Owen, R. C., Helmig, D., Hueber, J., Kumar, S.,  
 299 Perlinger, J. A., Kramer, L. J., Dziobak, M. P., Ampadu, M. T., Olsen, S., Wuebbles, D. J., and Mazzoleni,  
 300 L. R.: Molecular characterization of free tropospheric aerosol collected at the Pico Mountain Observatory:  
 301 a case study with a long-range transported biomass burning plume, Atmos. Chem. Phys., 15(9), 5047–5068,  
 302 doi:10.5194/acp-15-5047-2015, 2015.  
 303 Honrath, R. E., Helmig, D., Owen, R. C., Parrish, D. D. and Tanner, D. M.: Nonmethane hydrocarbons at Pico  
 304 Mountain, Azores: 2. Event-specific analyses of the impacts of mixing and photochemistry on hydrocarbon

305 ratios, *Journal of Geophysical Research: Atmospheres* (1984–2012), 113(D20), doi:10.1029/2008jd009832,  
306 2008.

307 Kleissl, J., Honrath, R. E., Dziobak, M. P., Tanner, D., Val Martín, M., Owen, R. C. and Helmig, D.: Occurrence of  
308 upslope flows at the Pico mountaintop observatory: A case study of orographic flows on a small, volcanic  
309 island, *J. Geophys. Res.-Atmos.*, 112(D10), doi:10.1029/2006jd007565, 2007.

310 Koch, B. P. and Dittmar, T.: From mass to structure: an aromaticity index for high-resolution mass data of natural  
311 organic matter, *Rapid Commun. Mass Sp.*, 20(5), 926–932, doi:10.1002/rcm.2386, 2006. Koch, B. P. and  
312 Dittmar, T.: From mass to structure: an aromaticity index for high-resolution mass data of natural organic  
313 matter, *Rapid Commun. Mass Sp.*, 30(1), 250, doi: 10.1002/rcm.7433, 2016.

314 Kroll, J. H., Donahue, N. M., Jimenez, J. L., Kessler, S. H., Canagaratna, M. R., Wilson, K. R., Altieri, K. E.,  
315 Mazzoleni, L. R., Wozniak, A. S., Bluhm, H., Mysak, E. R., Smith, J. D., Kolb, C. E. and Worsnop, D. R.:  
316 Carbon oxidation state as a metric for describing the chemistry of atmospheric organic aerosol, *Nat. Chem.*,  
317 3(2), nchem.948, doi:10.1038/nchem.948, 2011.

318 Li, Y., Pöschl, U. and Shiraiwa, M.: Molecular corridors and parameterizations of volatility in the chemical  
319 evolution of organic aerosols, *Atmos. Chem. Phys.*, 16(5), 3327–3344, doi:10.5194/acp-16-3327-2016,  
320 2016.

321 Mazzoleni, L. R., Saranjampour, P., Dalbec, M. M., Samburova, V., Hallar, A. G., Zielinska, B., Lowenthal, D. H.  
322 and Kohl, S.: Identification of water-soluble organic carbon in non-urban aerosols using ultrahigh-  
323 resolution FT-ICR mass spectrometry: organic anions, *Environ. Chem.*, 9(3), 285–297,  
324 doi:10.1071/en11167, 2012.

325 Olivier, J.G.J. and Berdowski, J.J.M.: Global emissions sources and sinks, in: *The Climate System*, Berdowski, J.,  
326 Guicherit, R. and Heij, B.J., A.A. Balkema Publishers/Swets & Zeitlinger Publishers, Lisse, The  
327 Netherlands. 33-78, 2001.

328 Owen, R. C. and Honrath, R. E.: Technical note: a new method for the Lagrangian tracking of pollution plumes from  
329 source to receptor using gridded model output, *Atmospheric Chemistry and Physics*, 9(7), 2577–2595,  
330 doi:10.5194/acp-9-2577-2009, 2009.

331 Rémillard, J., Kollias, P., Luke, E. and Wood, R.: Marine Boundary Layer Cloud Observations in the Azores, *J.*  
332 *Climate*, 25(21), 7381–7398, doi:10.1175/jcli-d-11-00610.1, 2012.

333 Seibert, P. and Frank, A.: Source-receptor matrix calculation with a Lagrangian particle dispersion model in  
334 backward mode, *Atmospheric Chemistry and Physics*, 4(1), 51–63, doi:10.5194/acp-4-51-2004, 2004.

335 Shiraiwa, M., Li, Y., Tsimpidi, A., Karydis, V., Berkemeier, T., Pandis, S., Lelieveld, J., Koop, T. and Pöschl, U.:  
336 Global distribution of particle phase state in atmospheric secondary organic aerosols, *Nat. Commun.*, 8,  
337 ncomms15002, doi:10.1038/ncomms15002, 2017.

338 Stohl, A., Forster, C., Frank, A., Seibert, P. and Wotawa, G.: Technical note: The Lagrangian particle dispersion  
339 model FLEXPART version 6.2, *Atmospheric Chemistry and Physics*, 5(9), 2461–2474, doi:10.5194/acp-5-  
340 2461-2005, 2005.

341 Zhang, B., Owen, R. C., Perlinger, J. A., Helmig, D., Val Martín, M., Kramer, L., Mazzoleni, L. R. and Mazzoleni,  
342 C.: Ten-year chemical signatures associated with long-range transport observed in the free troposphere over  
343 the central North Atlantic, *Elem. Sci. Anth.*, 5, doi:10.1525/elementa.194, 2017.
