# Supplementary material for: Molecular and physical characteristics of aerosol at a remote marine free troposphere site: Implications for atmospheric aging
Source: Copernicus journal article supplement (doi:10.5194/acp-2018-196), 2018-02-23
Supplement: Supplementary file [file acp-2018-196-AC1-supplement.pdf]

Two of the subplots in Figure 1 were inadvertently misplaced in the original version. The corrected version is provided here.

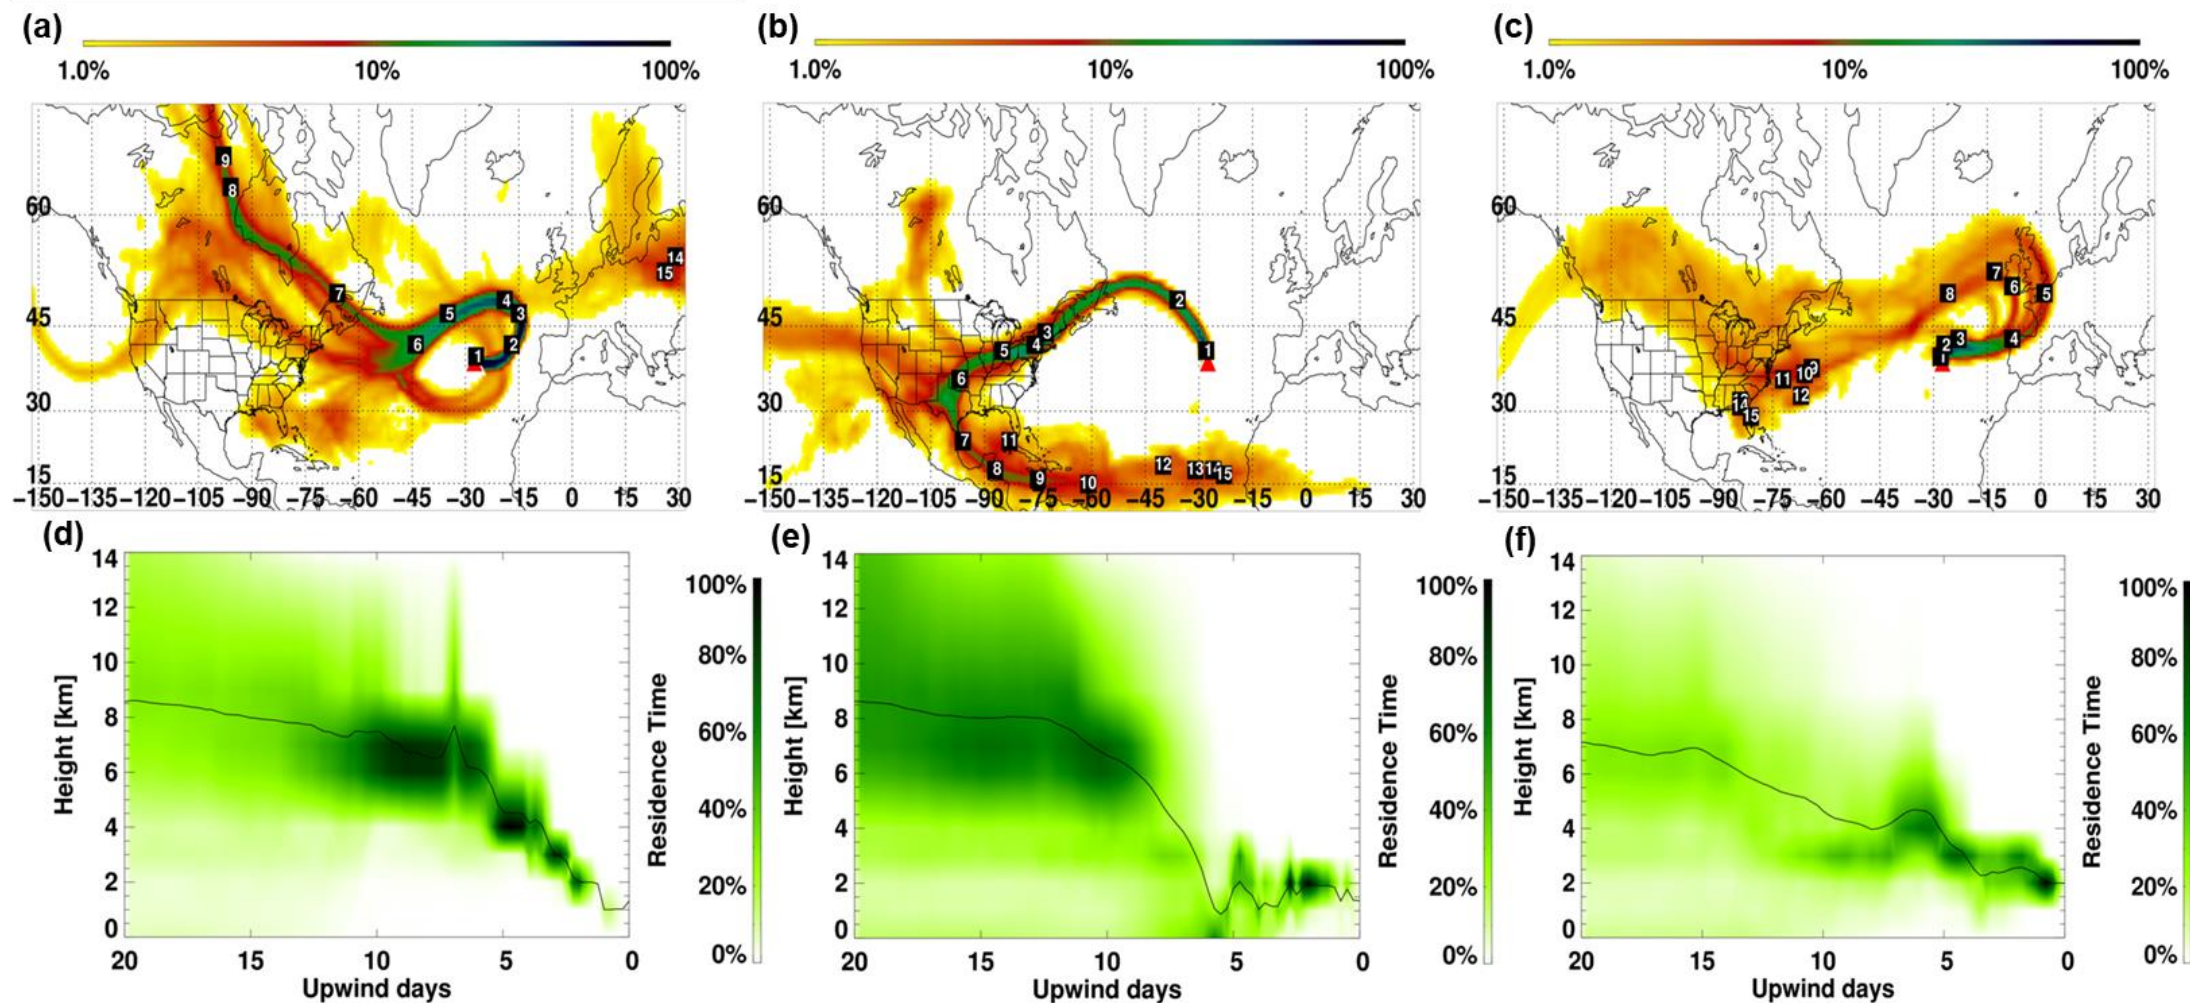

**Figure 1.** FLEXPART retroplumes for 27-28 June 2013 (PMO-1, (a, d)), 5-6 July 2014 (PMO-2, (b, e)), and 20-21 June 2015 (PMO-3, (c, f)): column integrated residence time over the 20-day transport time (a-c) and vertical distribution of the retroplume residence time at given upwind times (d-f). The white labels indicate the approximate locations of the center of the plume for each of the transport days. Residence time is color coded by logarithmic grades representing its ratio to the location of maximal integrated residence time (100%). The black line indicates the mean height of the plume during transport.
